# Supplementary material for: Muscle weakness precedes atrophy during cancer cachexia and is linked to muscle-specific mitochondrial stress
Source: JCI Insight. 2022 Dec 22;7(24):e155147. doi: 10.1172/jci.insight.155147 (PMC9869968; doi:10.1172/jci.insight.155147)
Supplement: Supplemental data [file jciinsight-7-155147-s084.pdf]

Glutamate (State III)

Succinate (State III)

Pyruvate/Malate (State II)

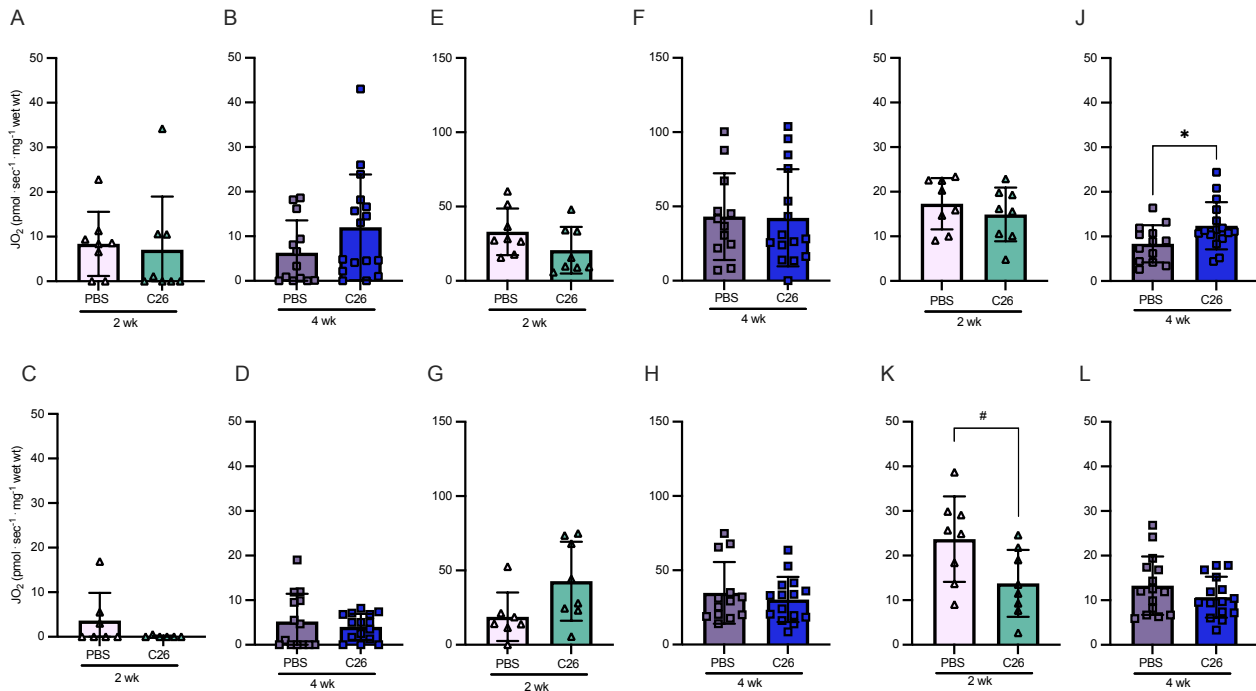

Glutamate (State III)

Succinate (State III)

Pyruvate/Malate (State II)

- Creatine

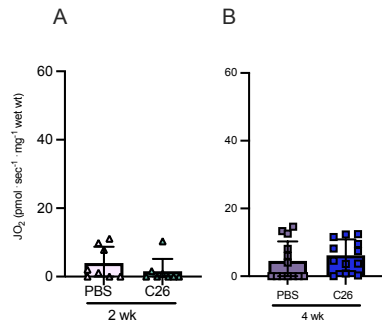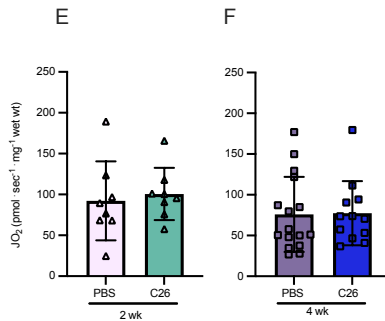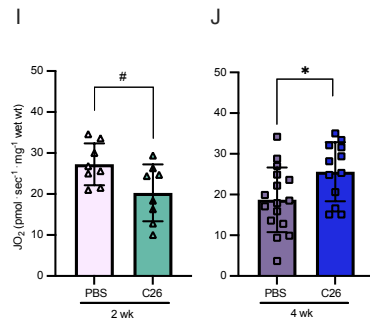

+ Creatine

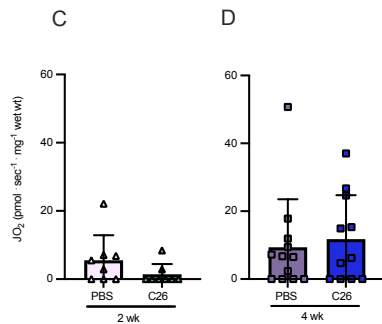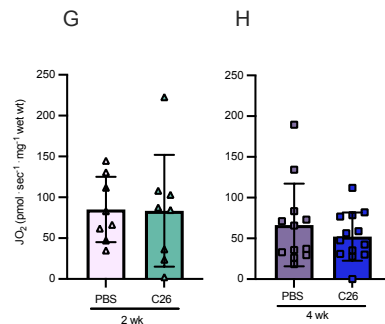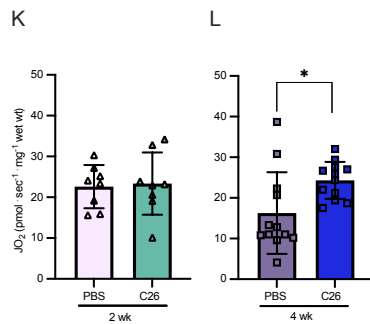

2 Weeks

4 Weeks

Quadriceps

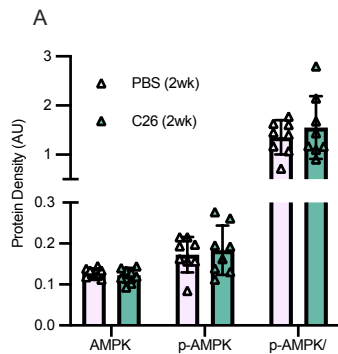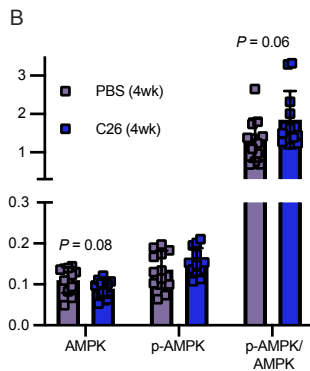

E

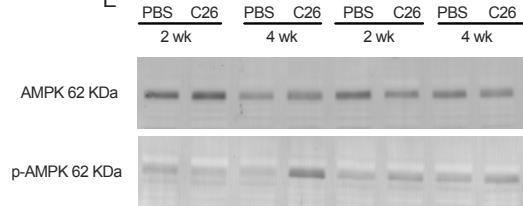

Diaphragm

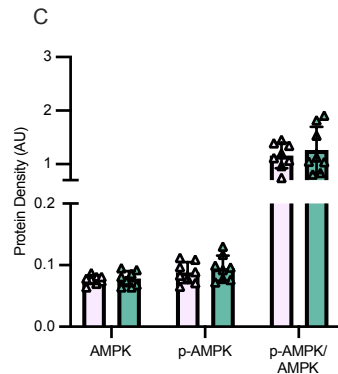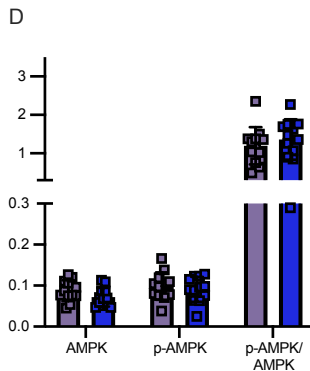

F

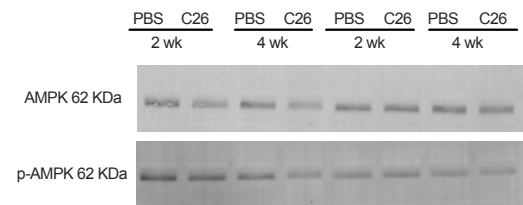

# Succinate Stimulated $H_2O_2$

Quadriceps

Diaphragm

2 Weeks

4 Weeks

2 Weeks

4 Weeks

State II

+ ADP

State II

+ ADP

State II

+ ADP

State II

+ ADP

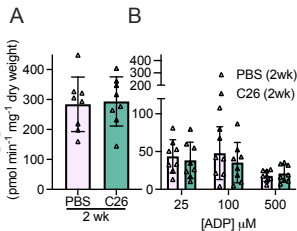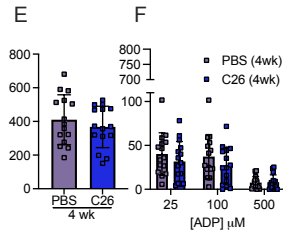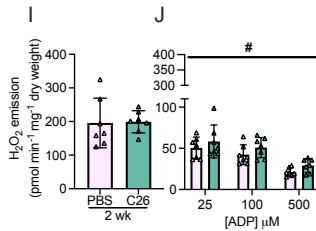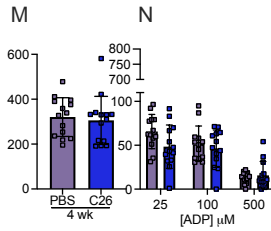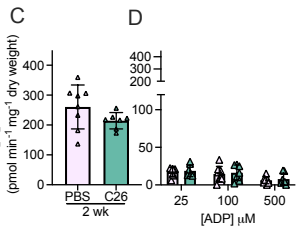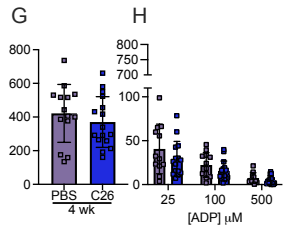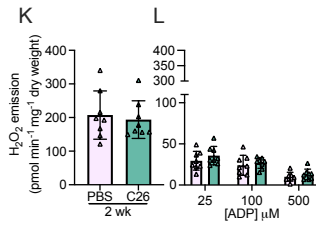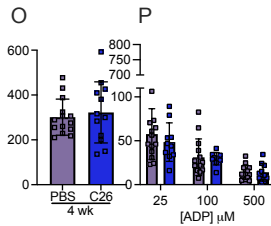

- Creatine

+ Creatine

## 1 Supplemental Figure Legends

2 **Figure S1** Multiple substrate evaluation of oxygen consumption in quadriceps permeabilized  
3 muscle fibre bundles. Oxygen consumption was evaluated in the absence of creatine at 2 weeks  
4 and 4 weeks post C26 implantation or PBS injections in permeabilized muscle fibres when  
5 stimulated with glutamate (*A, B*), succinate (*E, F*) and pyruvate/malate (*I, J*). This was repeated in  
6 the presence of 20mM Creatine (*C, D, G, H, K, L*). Results represent mean  $\pm$  SD; n=8-16; #  $P<0.05$   
7 PBS (2wk) vs C26 (2wk); \*  $P<0.05$  PBS (4wk) vs C26 (4wk)

8  
9 **Figure S2** Multiple substrate evaluation of oxygen consumption in diaphragm permeabilized  
10 muscle fibre bundles. Oxygen consumption was evaluated in the absence of creatine at 2 weeks  
11 and 4 weeks post C26 implantation or PBS injections in permeabilized muscle fibres when  
12 stimulated with glutamate (*A, B*), succinate (*E, F*) and pyruvate/malate (*I, J*). This was repeated in  
13 the presence of 20mM Creatine (*C, D, G, H, K, L*). Results represent mean  $\pm$  SD; n=8-16; #  $P<0.05$   
14 PBS (2wk) vs C26 (2wk); \*  $P<0.05$  PBS (4wk) vs C26 (4wk).

15  
16 **Figure S3** Muscle-specific changes in markers of growth in C26 tumour-bearing skeletal muscle.  
17 Protein content of AMPK $\alpha$  and P-AMPK $\alpha$  were quantified at in the quadriceps at 2 weeks (*A*,  
18  $n=8$ ) and 4 weeks (*B*,  $n=12$ ). Markers were also quantified at in the diaphragm at 2 weeks (*C*,  $n=8$ )  
19 and 4 weeks (*D*,  $n=12$ ). *E*, representative image for quadriceps and *F*, representative image for  
20 diaphragm. Results represent mean  $\pm$  SD.

21  
22 **Figure S4** Succinate stimulated mH<sub>2</sub>O<sub>2</sub> emission in quadriceps and diaphragm muscle of C26  
23 tumour bearing mice. At 2 and 4 weeks, quadriceps mH<sub>2</sub>O<sub>2</sub> emission supported by succinate

24 (10mM) (FADH<sub>2</sub>) was assessed under maximal State II (no ADP) conditions in the absence of  
25 creatine (*A, E*) and in the presence of 20mM Creatine (*C, G*). State III (range of [ADP] to model  
26 metabolic demand) was also assessed in the absence of creatine (*B, F*) and in the presence of 20mM  
27 creatine (*D* and *H*). These measures were repeated in the diaphragm (I-P). Results represent mean  
28  $\pm$  SD; n=7-16; #  $P < 0.05$ , PBS (2wk) vs C26 (2wk); \*  $P < 0.05$ , PBS (4wk) vs C26 (4wk).

29
